# Supplementary material for: Geographic Expansion of the Invasive Mosquito Aedes albopictus across Panama—Implications for Control of Dengue and Chikungunya Viruses
Source: PubMed Central journal article supplement (PMC4287627; doi:10.1371/journal.pntd.0003383), 2015-01-08

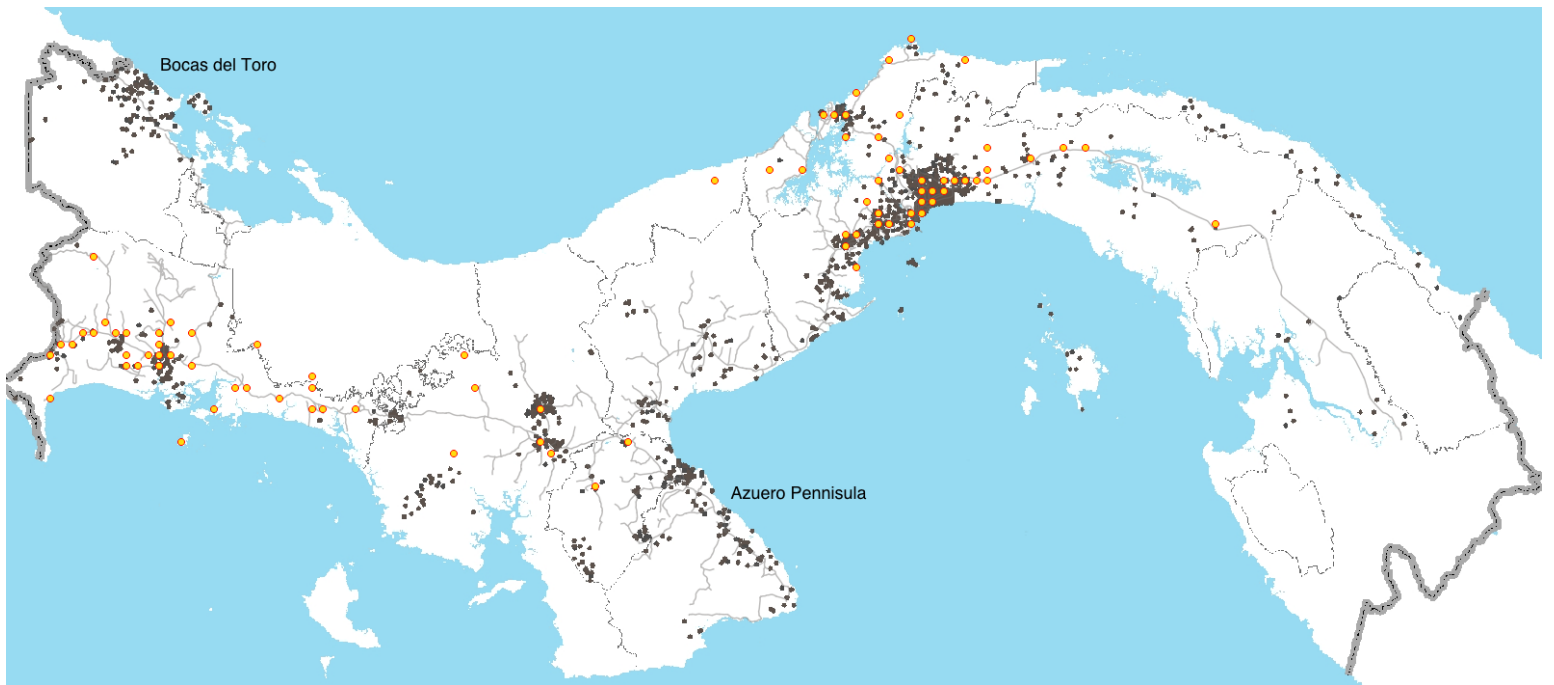

Supplement: pntd.0003383.s001.pdf [file pntd.0003383.s001.pdf]
